# Supplementary material for: uL3 Mediated Nucleolar Stress Pathway as a New Mechanism of Action of Antiproliferative G-quadruplex TBA Derivatives in Colon Cancer Cells
Source: Biomolecules. 2020 Apr 10;10(4):583. doi: 10.3390/biom10040583 (PMC7226491; doi:10.3390/biom10040583)
Supplement: Supplementary file 1 [file biomolecules-10-00583-s001.pdf]

## **uL3 mediated nucleolar stress pathway as a new mechanism of action of antiproliferative G-quadruplex TBA derivatives in colon cancer cells**

Annalisa Pecoraro<sup>1</sup>, Antonella Virgilio<sup>1</sup>, Veronica Esposito<sup>1</sup>, Aldo Galeone<sup>1</sup>, Giulia Russo<sup>1\*</sup>, Annapina Russo<sup>1\*</sup>.

<sup>1</sup>Department of Pharmacy, University of Naples “Federico II”, Via Domenico Montesano 49, 80131 Naples, Italy

\*Correspondence to: Annapina Russo and Giulia Russo, Department of Pharmacy, University of Naples “Federico II”, Via Domenico Montesano 49, 80131 Naples, Italy, Tel: +39 081 678414; +39 081 7463074; Email: [annapina.russo@unina.it](mailto:annapina.russo@unina.it); [giulia.russo@unina.it](mailto:giulia.russo@unina.it)

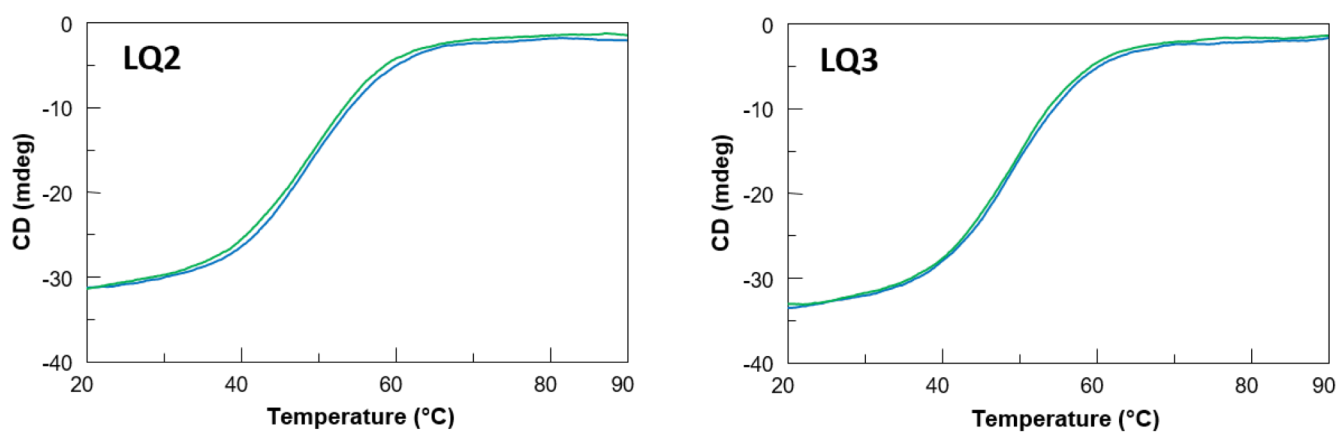

**Figure S1.** CD heating and cooling experiments. CD melting (blue) and annealing (green) curves registered as a function of temperature of the modified quadruplexes LQ2 and LQ3 at 294 nm. CD data were recorded in a 0.1 cm pathlength cuvette with a scan rate of 30°C/h at 50  $\mu$ M ODN strand concentration in  $K^+$  buffer (10 mM  $KH_2PO_4/K_2HPO_4$ , 70 mM KCl, pH 7.0).

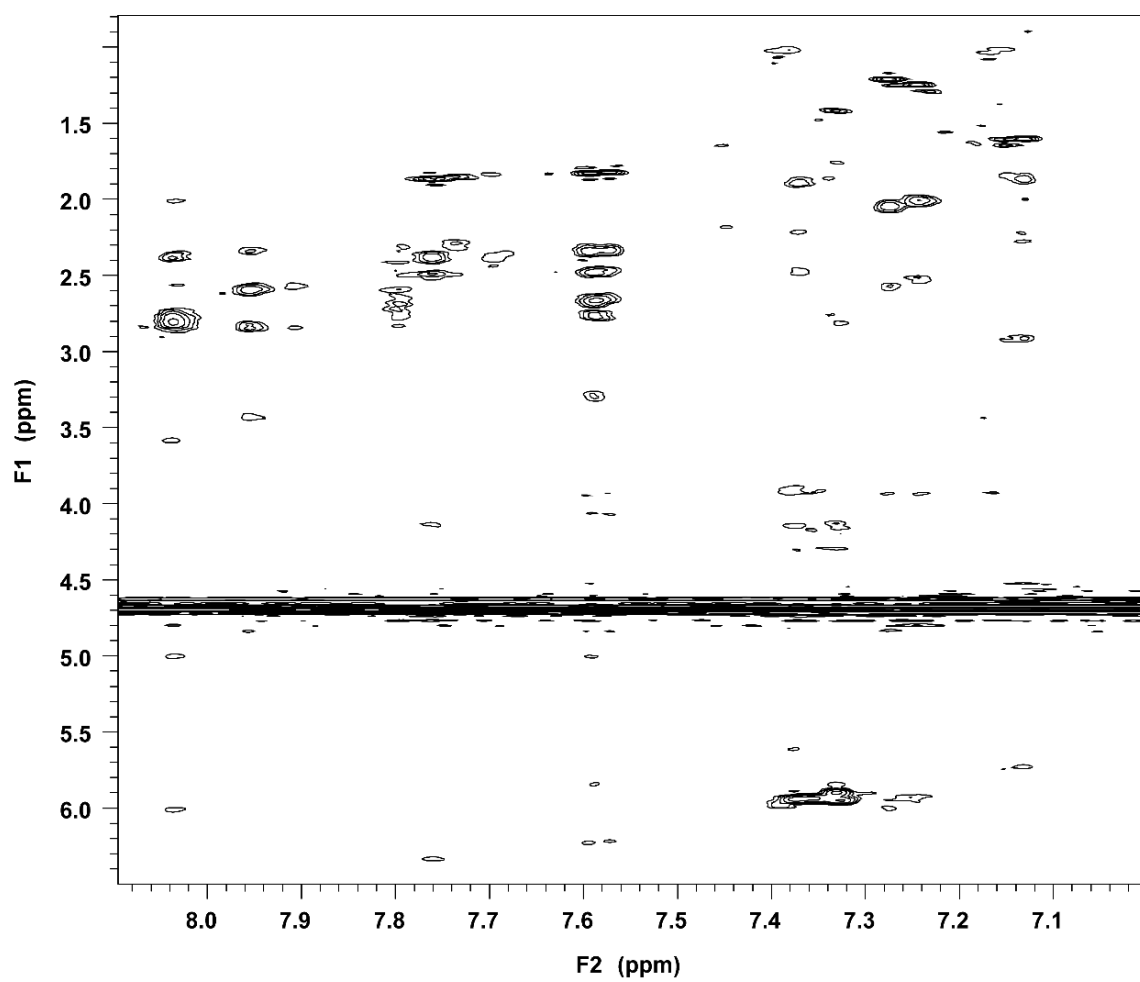

**Figure S2.** Two-dimensional NMR experiments. Expanded 2D NOESY spectrum of LQ2 (500 MHz; 25°C; strand concentration 3 mM; 10 mM  $\text{KH}_2\text{PO}_4/\text{K}_2\text{HPO}_4$ , 70 mM KCl and 0.2 mM EDTA, pH 7.0 in  $\text{H}_2\text{O}/\text{D}_2\text{O}$  9:1; total volume 0.6 ml; mixing time 180 ms) correlating aromatic base protons and sugar protons.

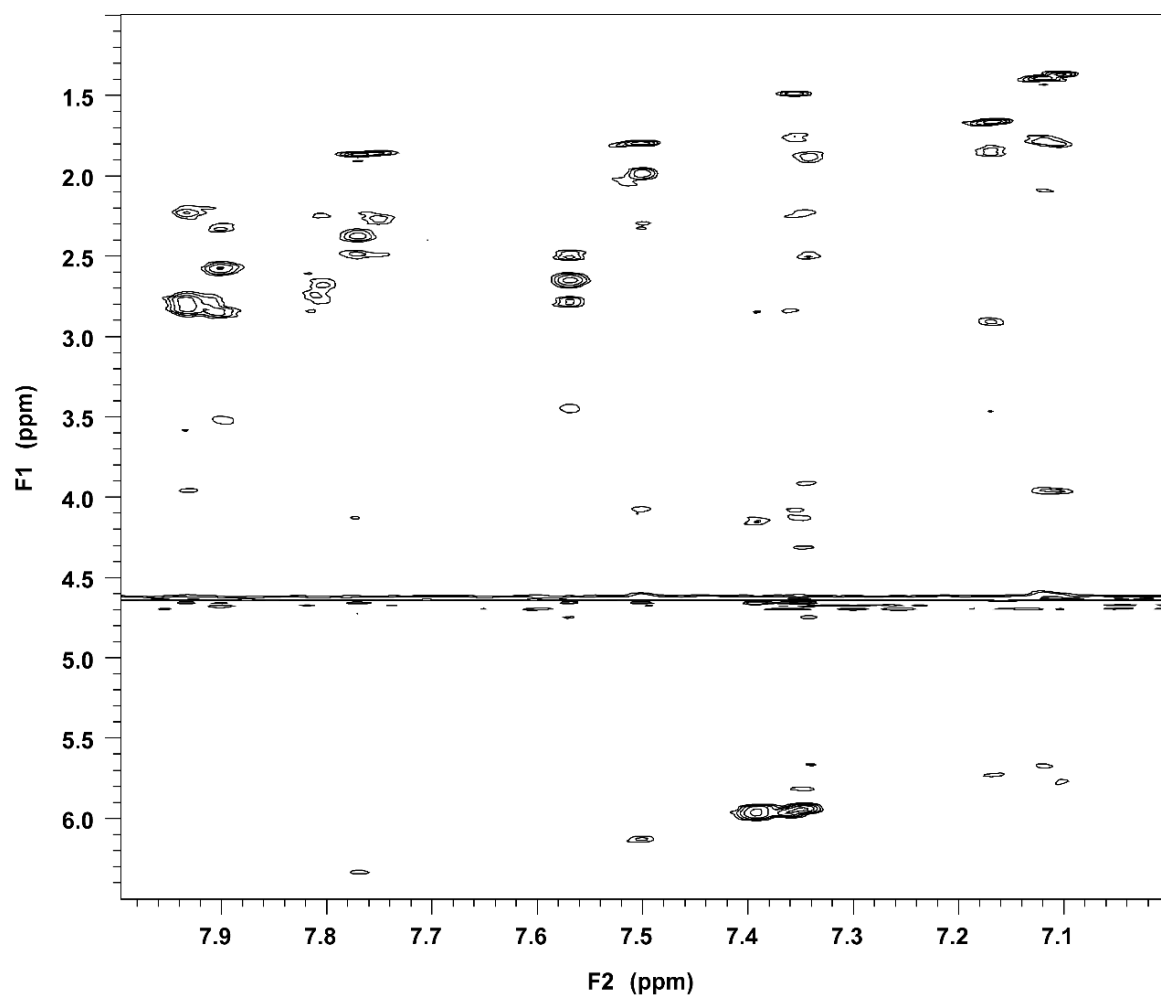

**Figure S3.** Two-dimensional NMR experiments. Expanded 2D NOESY spectrum of LQ3 (500 MHz; 25°C; strand concentration 3 mM; 10 mM  $\text{KH}_2\text{PO}_4/\text{K}_2\text{HPO}_4$ , 70 mM KCl and 0.2 mM EDTA, pH 7.0 in  $\text{H}_2\text{O}/\text{D}_2\text{O}$  9:1; total volume 0.6 ml; mixing time 180 ms) correlating aromatic base protons and sugar protons.

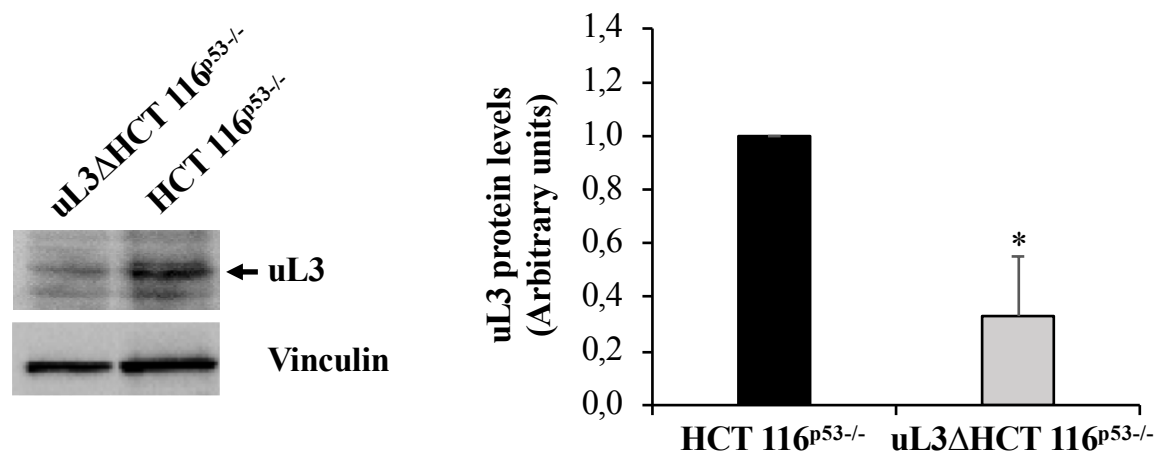

**Figure S4.** Representative western blotting analysis of uL3 in HCT 116p53<sup>-/-</sup> and uL3ΔHCT 116p53<sup>-/-</sup> cells. Protein extracts were analyzed by western blotting with the indicated antibodies. Vinculin was used as loading controls. Full-length blot is presented in Figure S8. Quantification of signals is shown. Bars represent the mean of triplicate experiments; error bars represent the standard deviation. \*p < 0.05 vs. HCT 116p53<sup>-/-</sup> cells set at 1.

A

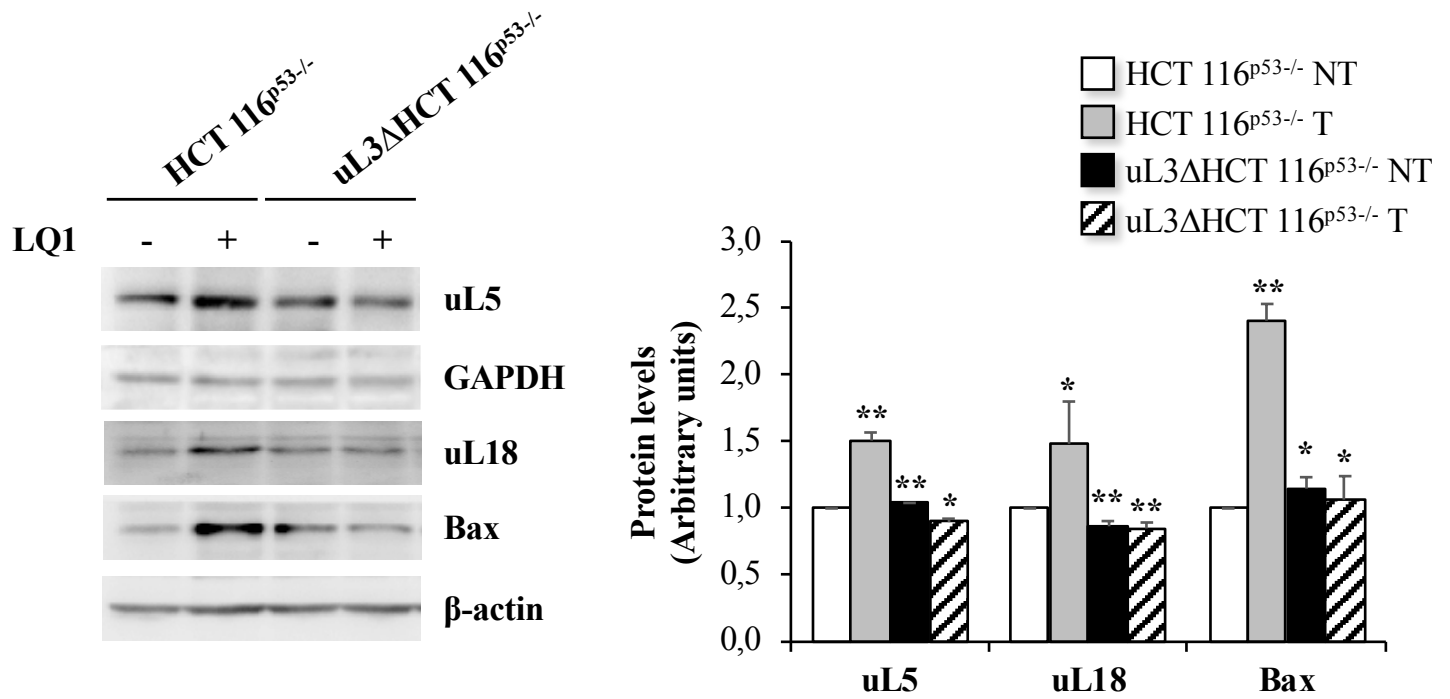

B

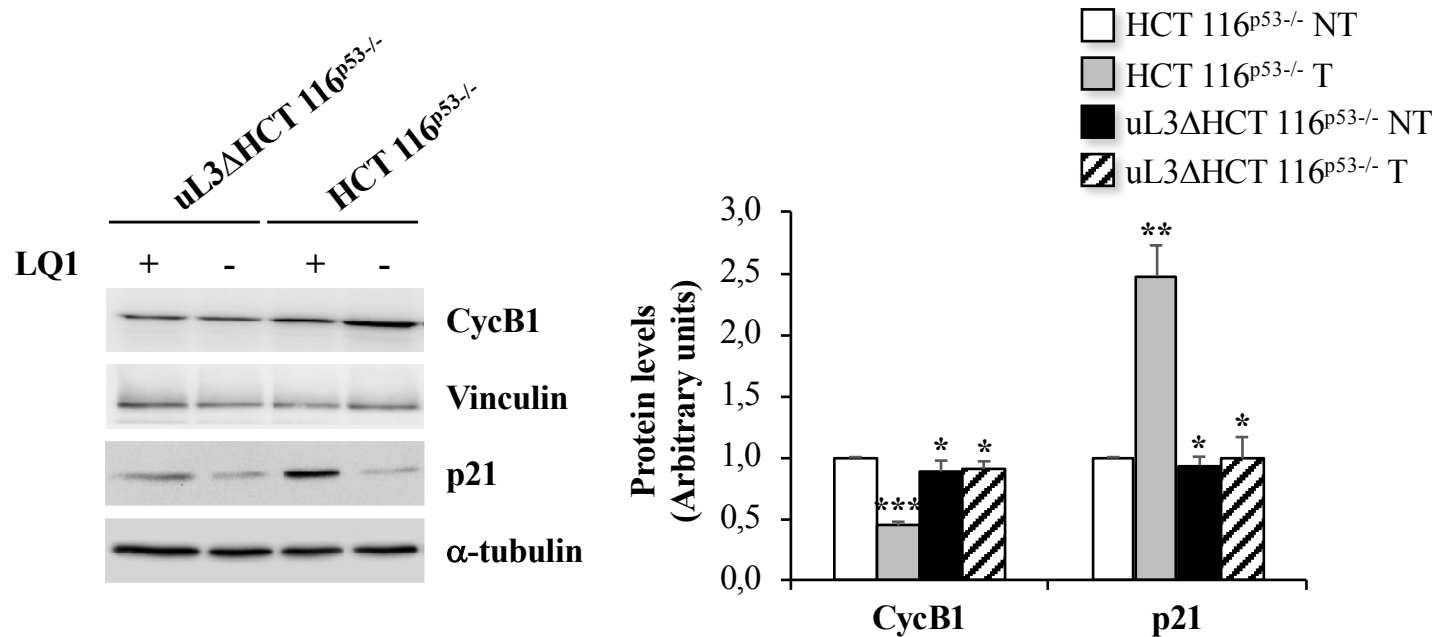

**Figure S5.** LQ1 treatment modulates the expression of nucleolar stress, cell cycle and apoptosis related genes. Representative western blot analysis of uL5, uL18 and Bax (A), CycB1 and p21 (B). HCT 116<sup>p53-/-</sup> and uL3 $\Delta$ HCT 116<sup>p53-/-</sup> cells were treated with 10  $\mu$ M of LQ1 for 48h. After treatment, protein extracts from the samples were analyzed by western blotting with antibodies against indicated proteins. GAPDH,  $\beta$ -actin, Vinculin and  $\alpha$ -tubulin were used as loading controls. Full-length blot is presented in Figures S9 and S10. Quantification of signals is shown. Bars represent the mean of triplicate experiments; error bars represent the standard deviation. \* $P$ <0.05, \*\* $P$ <0.01, \*\*\* $P$ <0.001 vs. HCT 116<sup>p53-/-</sup> cells set at 1. NT: untreated; T: LQ1 treated.

**A**

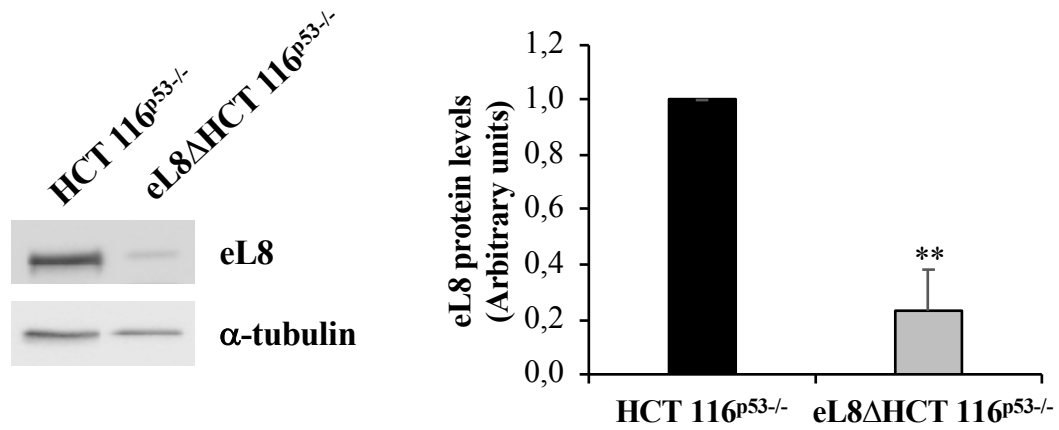

**B**

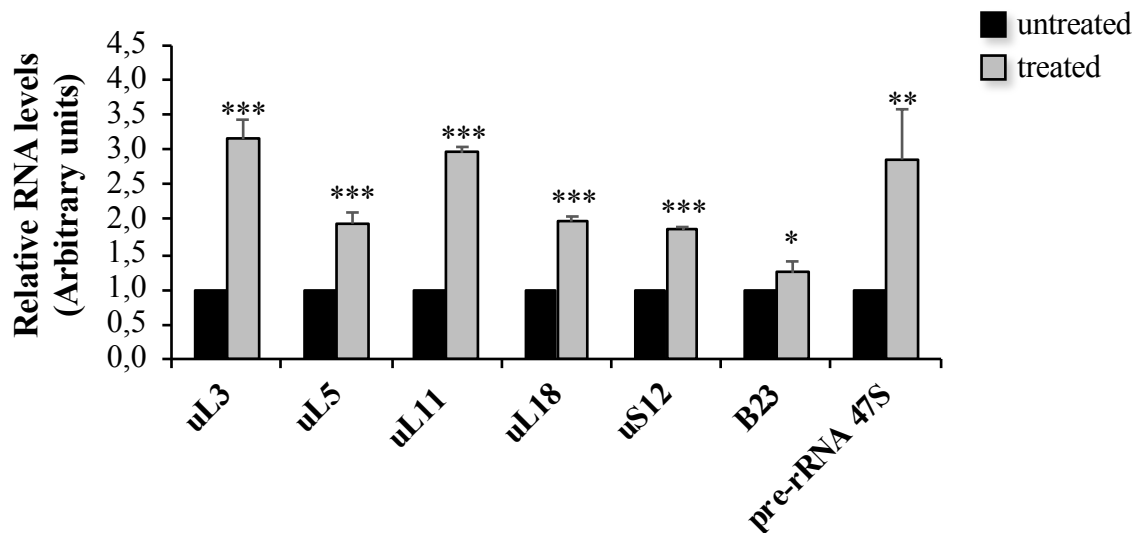

**Figure S6.** LQ1 treatment induces nucleolar stress in eL8ΔHCT 116<sup>p53-/-</sup> cells. **(A)** Representative western blot analysis of eL8 in HCT 116<sup>p53-/-</sup> and eL8ΔHCT 116<sup>p53-/-</sup> cells. Protein extracts were analyzed by western blotting with the indicated antibodies. α-tubulin was used as loading controls. Full-length blot is presented in Figure S11. Quantification of signals is shown. Bars represent the mean of triplicate experiments; error bars represent the standard deviation. \*\*p < 0.01 vs. HCT 116<sup>p53-/-</sup> cells set at 1. **(B)** Total RNA from eL8ΔHCT 116<sup>p53-/-</sup> cells, untreated or treated with 10 μM of LQ1 for 48 h, was subjected to RT-qPCR with primers specific for indicated genes (Table 2). Quantification of signals is shown. Bars represent the mean of triplicate experiments; error bars represent the standard deviation. \*P<0.05, \*\*P<0.01, \*\*\*P<0.001 vs. untreated cells set at 1.

**A**

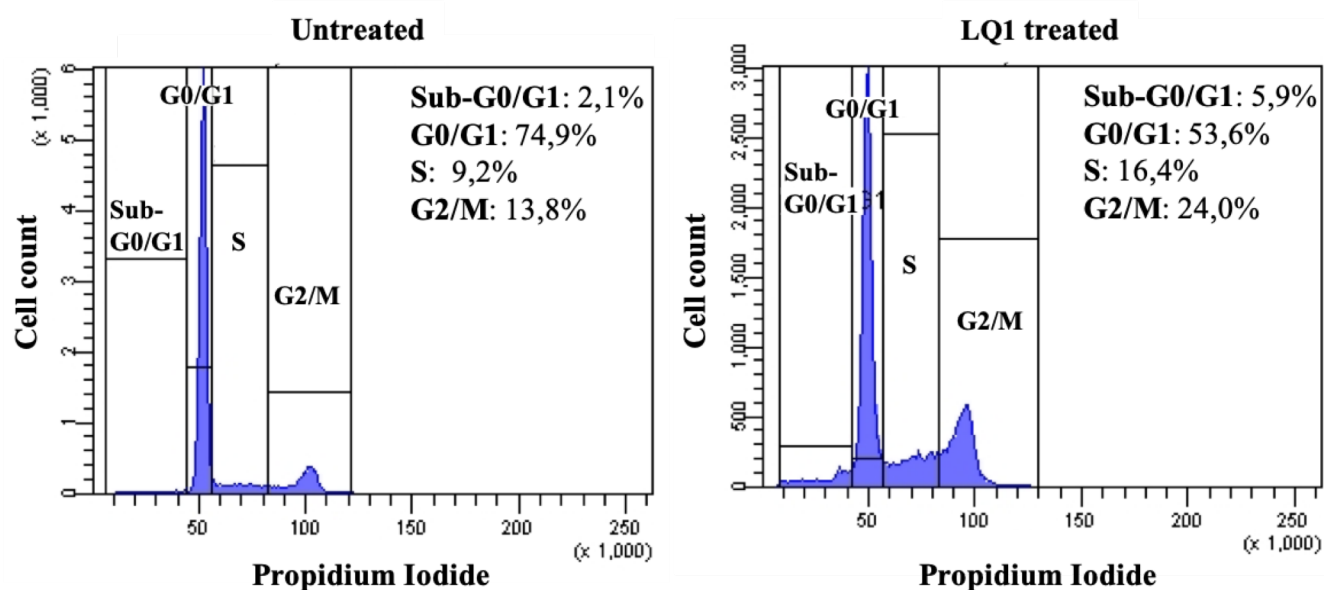

**B**

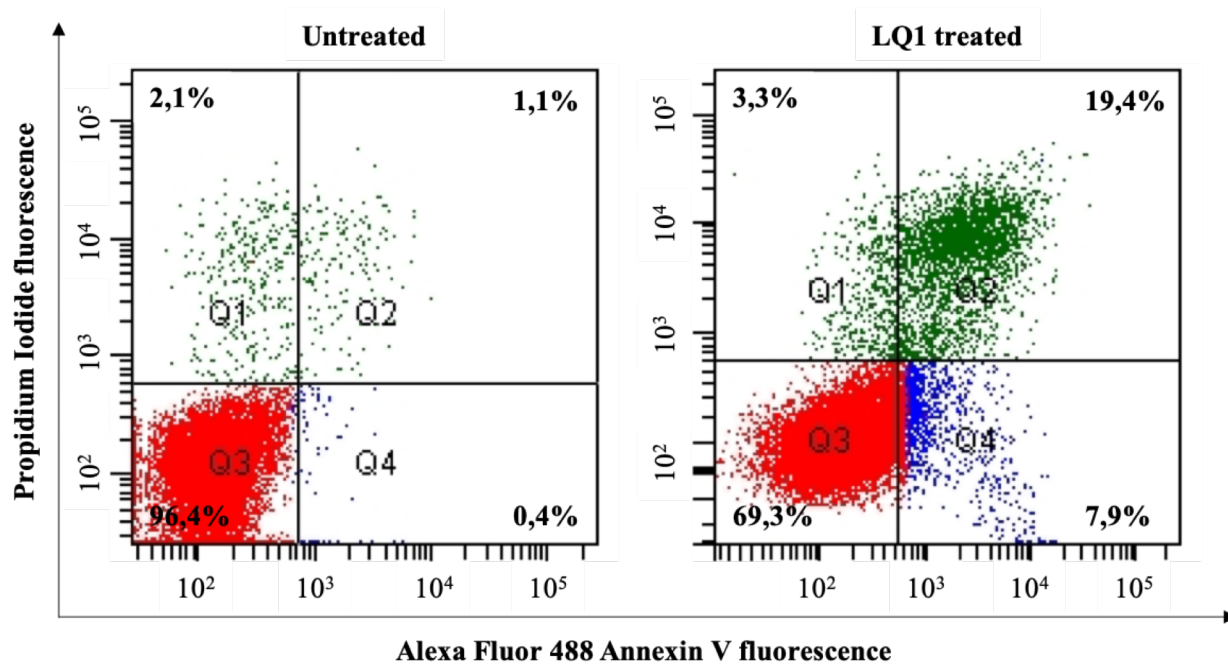

**Figure S7.** LQ1 treatment causes cell cycle arrest and apoptosis in eL8ΔHCT 116<sup>p53-/-</sup> cells. (A) Cells were incubated with 10 μM of LQ1 for 48 h and the cell cycle distribution was evaluated using PI staining and flow cytometry analysis. (B) Cell death was assessed by FACS analysis of Annexin V and PI staining. Representative dot plots are shown.

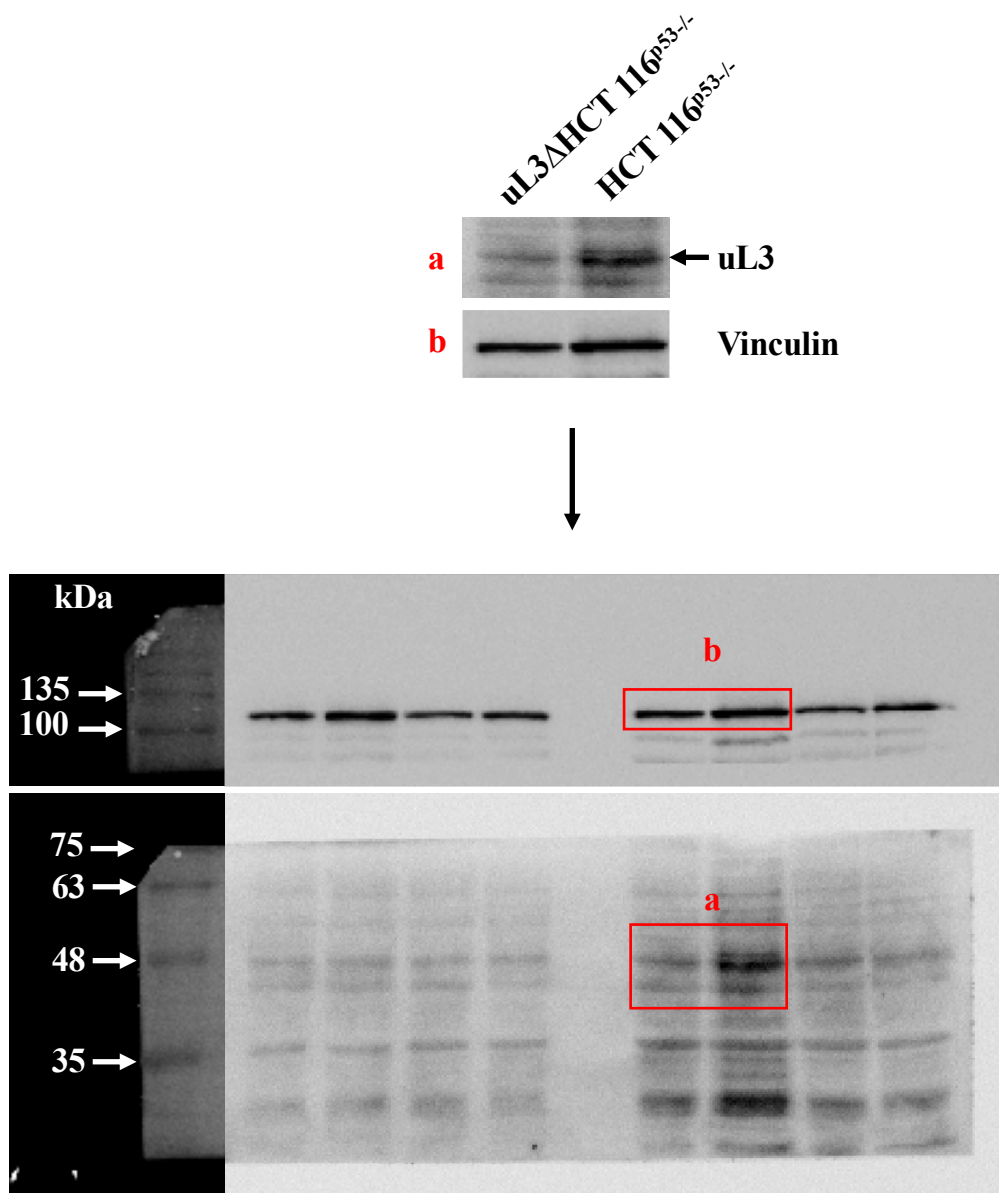

**Figure S8.** Full-length blots of western blotting showed in Figure S4.

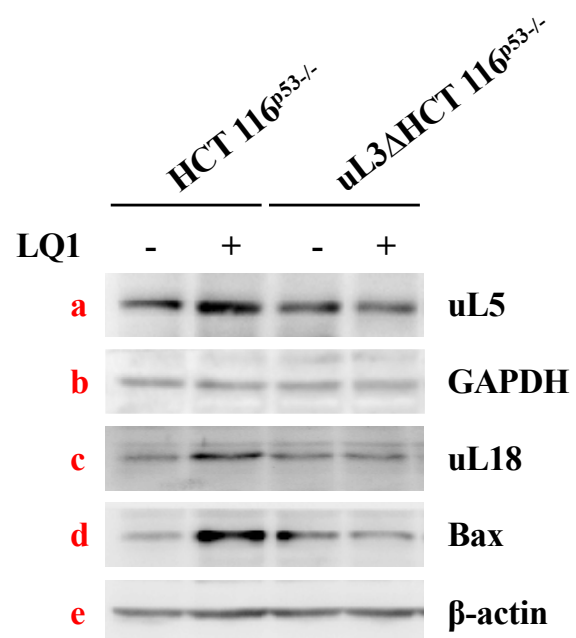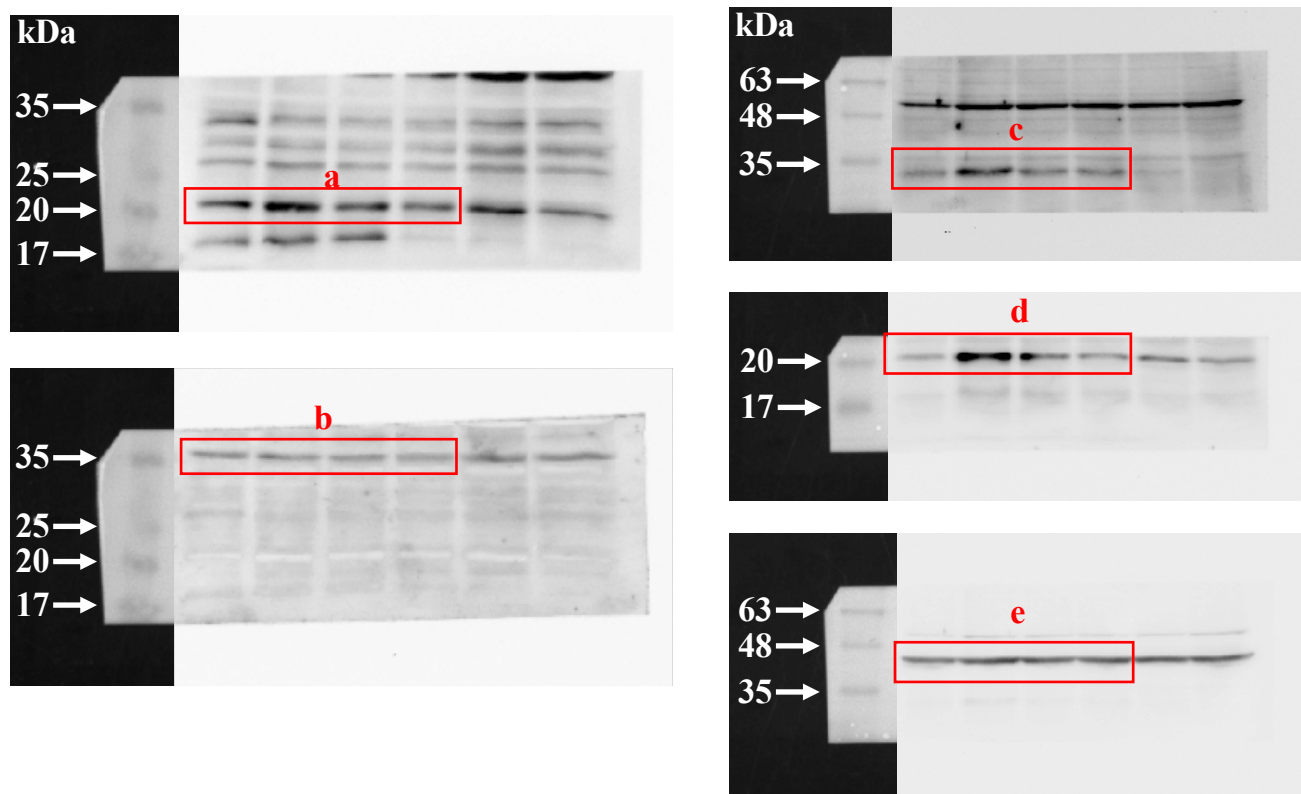

**Figure S9.** Full-length blots of western blotting showed in Figure S5A.

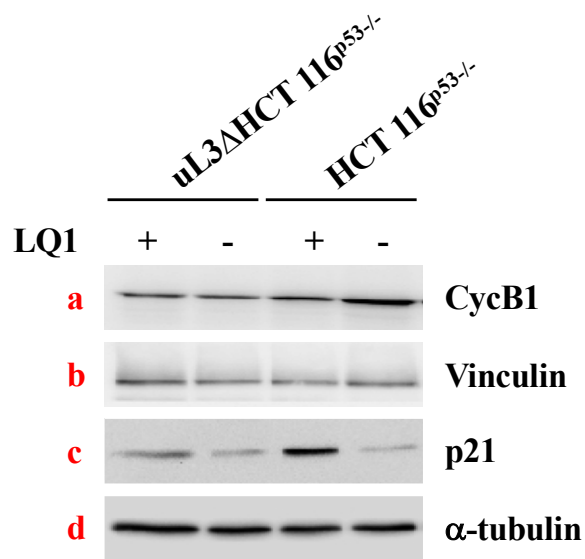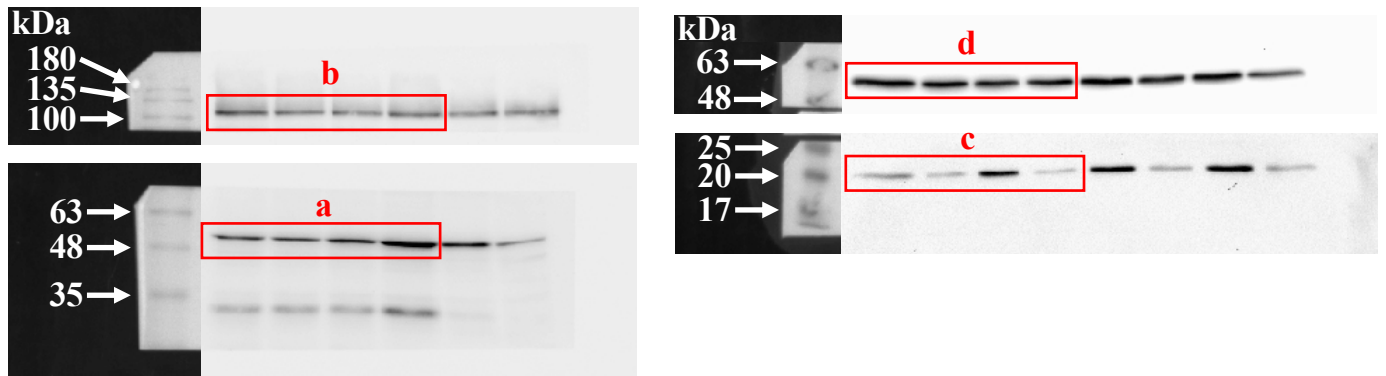

**Figure S10.** Full-length blots of western blotting showed in Figure S5B.

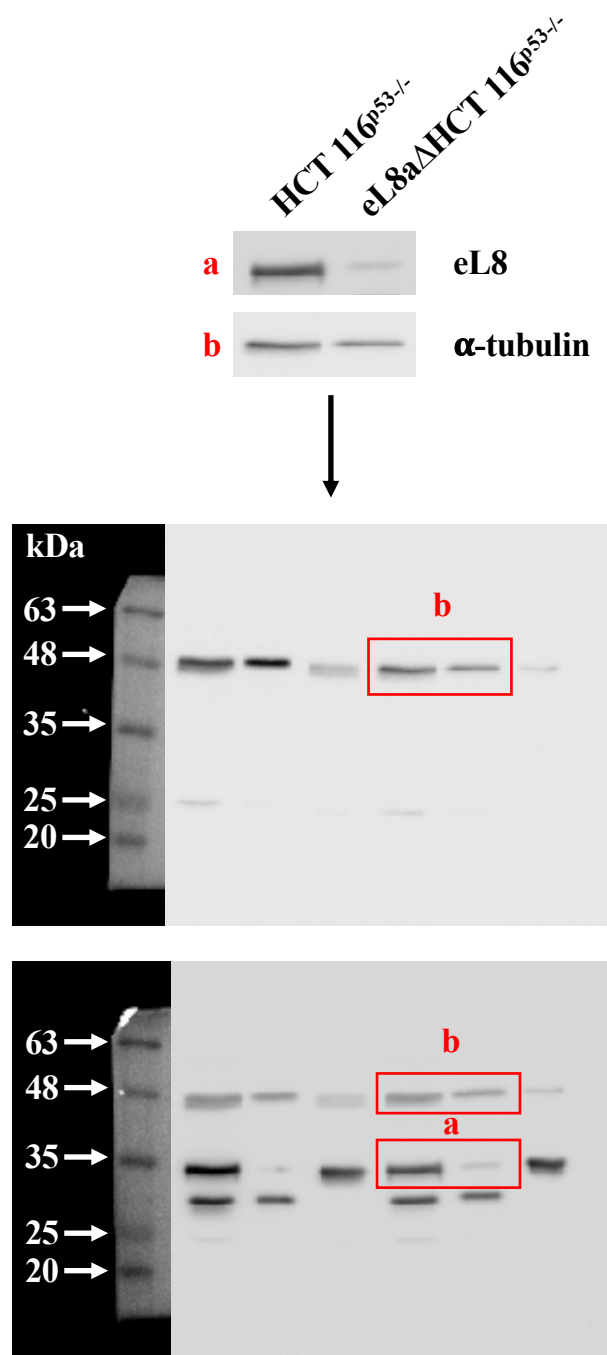

**Figure S11.** Full-length blots of western blotting showed in Figure S6A.

| <b>LQ2</b> 5'-G <sub>L1</sub> G <sub>L2</sub> T <sub>D3</sub> T <sub>L4</sub> G <sub>L5</sub> G <sub>L6</sub> T <sub>L7</sub> G <sub>L8</sub> T <sub>L9</sub> G <sub>L10</sub> G <sub>L11</sub> T <sub>D12</sub> T <sub>L13</sub> G <sub>L14</sub> G <sub>L15</sub> -3' |       |      |           |      |      |           |                 |
|-------------------------------------------------------------------------------------------------------------------------------------------------------------------------------------------------------------------------------------------------------------------------|-------|------|-----------|------|------|-----------|-----------------|
|                                                                                                                                                                                                                                                                         | H8/H6 | H1'  | H2'/H2''  | H3'  | H4'  | H5'/H5''  | CH <sub>3</sub> |
| <u>G<sub>L1</sub></u>                                                                                                                                                                                                                                                   | 7.32  | 5.95 | 2.82      | 4.89 | 4.30 | 4.16      | -               |
| G <sub>L2</sub>                                                                                                                                                                                                                                                         | 8.04  | 6.00 | 2.40/2.82 | 5.00 | 4.21 | 4.17      | -               |
| T <sub>D3</sub>                                                                                                                                                                                                                                                         | 7.60  | 6.23 | 2.34/2.49 | 4.84 | 4.24 | 4.07      | 1.83            |
| T <sub>L4</sub>                                                                                                                                                                                                                                                         | 7.25  | 5.93 | 2.02/2.53 | 4.79 | 4.22 | 3.93      | 1.26            |
| <u>G<sub>L5</sub></u>                                                                                                                                                                                                                                                   | 7.33  | 5.88 | 2.78/3.30 | 4.77 | 4.52 | 4.06      | -               |
| G <sub>L6</sub>                                                                                                                                                                                                                                                         | 7.59  | 5.84 | 2.49/2.68 | 5.01 | N.D. | 4.08/3.95 | -               |
| T <sub>L7</sub>                                                                                                                                                                                                                                                         | 7.76  | 6.34 | 2.38/2.51 | 4.75 | 4.31 | 4.15      | 1.86            |
| G <sub>L8</sub>                                                                                                                                                                                                                                                         | 7.37  | 5.61 | 1.90/2.22 | 4.57 | 4.30 | 3.90      | -               |
| T <sub>L9</sub>                                                                                                                                                                                                                                                         | 7.14  | 5.74 | 1.87/2.28 | 4.53 | 4.20 | N.D.      | 1.60            |
| <u>G<sub>L10</sub></u>                                                                                                                                                                                                                                                  | 7.36  | 5.94 | 2.82/3.58 | 4.80 | 4.16 | N.D.      | -               |
| G <sub>L11</sub>                                                                                                                                                                                                                                                        | 8.04  | 6.03 | 2.38/2.78 | 5.03 | N.D. | 4.14      | -               |
| T <sub>D12</sub>                                                                                                                                                                                                                                                        | 7.57  | 6.22 | 2.34/2.49 | 4.84 | 4.24 | 4.07/3.93 | 1.82            |
| T <sub>L13</sub>                                                                                                                                                                                                                                                        | 7.28  | 6.00 | 2.06/2.58 | 4.80 | 4.20 | 3.95      | 1.21            |
| <u>G<sub>L14</sub></u>                                                                                                                                                                                                                                                  | 7.37  | 5.94 | 2.84/3.43 | 4.84 | N.D. | N.D.      | -               |
| G <sub>L15</sub>                                                                                                                                                                                                                                                        | 7.95  | 6.05 | 2.35/2.61 | 4.80 | 4.29 | 4.16      | -               |

| <b>LQ3</b> 5'-G <sub>L1</sub> G <sub>L2</sub> T <sub>L3</sub> T <sub>D4</sub> G <sub>L5</sub> G <sub>L6</sub> T <sub>L7</sub> G <sub>L8</sub> T <sub>L9</sub> G <sub>L10</sub> G <sub>L11</sub> T <sub>L12</sub> T <sub>D13</sub> G <sub>L14</sub> G <sub>L15</sub> -3' |       |      |           |      |      |          |                 |
|-------------------------------------------------------------------------------------------------------------------------------------------------------------------------------------------------------------------------------------------------------------------------|-------|------|-----------|------|------|----------|-----------------|
|                                                                                                                                                                                                                                                                         | H8/H6 | H1'  | H2'/H2''  | H3'  | H4'  | H5'/H5'' | CH <sub>3</sub> |
| <u>G<sub>L1</sub></u>                                                                                                                                                                                                                                                   | 7.36  | 5.97 | 2.84      | 4.88 | N.D. | N.D.     | -               |
| G <sub>L2</sub>                                                                                                                                                                                                                                                         | 7.81  | 5.85 | 2.25/2.68 | 4.97 | 4.61 | 4.29     | -               |
| T <sub>L3</sub>                                                                                                                                                                                                                                                         | 7.36  | 5.85 | 2.10/2.24 | 4.86 | N.D. | N.D.     | 1.49            |
| T <sub>D4</sub>                                                                                                                                                                                                                                                         | 7.10  | 5.78 | 1.82/2.78 | 5.00 | 4.33 | N.D.     | 1.36            |
| <u>G<sub>L5</sub></u>                                                                                                                                                                                                                                                   | 7.35  | 5.94 | 2.80/3.45 | 4.78 | 4.30 | N.D.     | -               |
| G <sub>L6</sub>                                                                                                                                                                                                                                                         | 7.57  | 5.82 | 2.50/2.66 | 5.00 | 4.36 | 4.24     | -               |
| T <sub>L7</sub>                                                                                                                                                                                                                                                         | 7.77  | 6.34 | 2.38/2.50 | 4.75 | 4.31 | 4.14     | 1.86            |
| G <sub>L8</sub>                                                                                                                                                                                                                                                         | 7.34  | 5.68 | 1.88/2.23 | 4.69 | N.D. | N.D.     | -               |
| T <sub>L9</sub>                                                                                                                                                                                                                                                         | 7.17  | 5.74 | 1.84/2.29 | 4.53 | N.D. | 3.65     | 1.66            |
| <u>G<sub>L10</sub></u>                                                                                                                                                                                                                                                  | 7.39  | 5.94 | 2.85/3.60 | 4.80 | 4.29 | N.D.     | -               |
| G <sub>L11</sub>                                                                                                                                                                                                                                                        | 7.93  | 5.80 | 2.23/2.80 | 5.00 | 4.25 | 4.13     | -               |
| T <sub>L12</sub>                                                                                                                                                                                                                                                        | 7.50  | 6.13 | 2.00/2.31 | 4.62 | 4.26 | 4.08     | 1.80            |
| T <sub>D13</sub>                                                                                                                                                                                                                                                        | 7.12  | 5.68 | 1.78/2.08 | 4.61 | 4.28 | N.D.     | 1.39            |
| <u>G<sub>L14</sub></u>                                                                                                                                                                                                                                                  | 7.39  | 5.96 | 2.85/3.52 | 4.80 | 4.33 | 4.18     | -               |
| G <sub>L15</sub>                                                                                                                                                                                                                                                        | 7.90  | 6.02 | 2.34/2.59 | 4.69 | 4.12 | N.D.     | -               |

**Table S1.** Chemical shift values. Proton chemical shifts assignment for G-quadruplex formed by ODNs LQ2 and LQ3 (500 MHz, T = 25°C) in 10 mM KH<sub>2</sub>PO<sub>4</sub>/K<sub>2</sub>HPO<sub>4</sub>, 70 mM KCl and 0.2 mM EDTA (pH 7.0). N.D. = not determined. Residues adopting the syn glycosidic conformation are underlined.
